# Supplementary material for: Accurate assessment of land–atmosphere coupling in climate models requires high-frequency data output
Source: Copernicus journal article supplement (doi:10.5194/gmd-17-1869-2024), 2024-02-29
Supplement: Supplementary file 1 [file gmd-17-1869-2024-supplement.pdf]

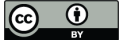

*Supplement of*

## **Accurate assessment of land–atmosphere coupling in climate models requires high-frequency data output**

**Kirsten L. Findell et al.**

*Correspondence to:* Kirsten L. Findell ([kirsten.findell@noaa.gov](mailto:kirsten.findell@noaa.gov))

The copyright of individual parts of the supplement might differ from the article licence.

### Flux site observations

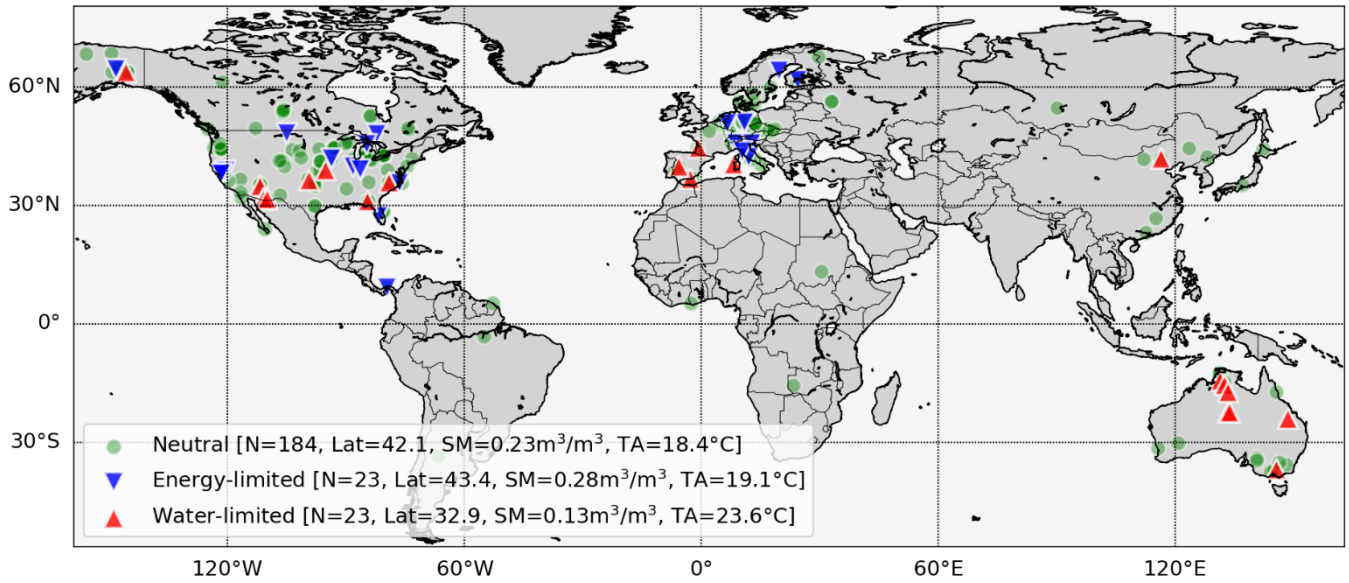

**Figure S1: Flux tower sites included in the composite mixing diagrams of Figure 5. N denotes the number of stations belonging to each category and Lat indicates the degree of departure from the equatorial. SM and TA are the climatology of surface soil moisture and surface air temperature during each hemisphere's warm season, respectively (for the Northern and Southern Hemisphere: May–September and November–March, respectively).**
